# Supplementary material for: Complete Genome Characterization of Penicillimonavirus gammaplasmoparae, a Bipartite Member of the Family Mymonaviridae
Source: MDPI journal article supplement (doi:10.3390/plants12183300), 2023-09-18
Supplement: s1 [file s1]

**Table S2.** Results of the BLASTN analysis performed for detection of *P. gammaplasmodia* RNA1 and RNA2 detection in SRAs (Bioproject PRJNA613358). Number of reads, coverage of RNA1/RNA2 molecules and E-value is shown.

| Bioproject PRJNA613358 |             | BLASTN of RNA_1 (OP042367) against each SRA |          |          |                     | BLASTN of RNA_2 (OP042368) against each SRA |          |          |                     |
|------------------------|-------------|---------------------------------------------|----------|----------|---------------------|---------------------------------------------|----------|----------|---------------------|
| SRA                    | Sample name | N° reads                                    | Coverage | Identity | E-value             | N° reads                                    | Coverage | Identity | E-value             |
| SRX7966246             | DMGA        | >5000                                       | 56,3%    | 99.5%    | 3×10 <sup>-16</sup> | >5000                                       | 48,2%    | 98.9%    | 3×10 <sup>-16</sup> |
| SRX7966247             | DMGB        | 902                                         | 98.1%    | 96.7%    | 3×10 <sup>-42</sup> | 2095                                        | 99,8%    | 79%      | 3×10 <sup>-42</sup> |
| SRX7966254             | DMGC        | >5000                                       | 97%      | 100%     | 3×10 <sup>-42</sup> | >5000                                       | 99,8%    | 87.1%    | 3×10 <sup>-42</sup> |
| SRX7966255             | DMGD        | >5000                                       | 98.1%    | 98.4%    | 2×10 <sup>-42</sup> | 3292                                        | 99.8%    | 89.5%    | 2×10 <sup>-42</sup> |
| SRX7966256             | DMGE        | >5000                                       | 95.0%    | 100%     | 2×10 <sup>-42</sup> | >5000                                       | 99.1%    | 100%     | 3×10 <sup>-42</sup> |
| SRX7966257             | DMGF        | -                                           | -        | -        | -                   | -                                           | -        | -        | -                   |
| SRX7966258             | DMGG        | >5000                                       | 96.0%    | 99.8%    | 3×10 <sup>-42</sup> | >5000                                       | 99.4%    | 99.9%    | 3×10 <sup>-42</sup> |
| SRX7966259             | DMS1        | -                                           | -        | -        | -                   | -                                           | -        | -        | -                   |
| SRX7966253             | DMS10       | -                                           | -        | -        | -                   | -                                           | -        | -        | -                   |
| SRX7966260             | DMS2        | -                                           | -        | -        | -                   | -                                           | -        | -        | -                   |
| SRX7966261             | DMS3        | -                                           | -        | -        | -                   | -                                           | -        | -        | -                   |
| SRX7966248             | DMS4        | -                                           | -        | -        | -                   | -                                           | -        | -        | -                   |
| SRX7966249             | DMS5        | -                                           | -        | -        | -                   | -                                           | -        | -        | -                   |
| SRX7966250             | DMS6        | -                                           | -        | -        | -                   | -                                           | -        | -        | -                   |
| SRX7966251             | DMS8        | -                                           | -        | -        | -                   | -                                           | -        | -        | -                   |
| SRX7966252             | DMS9        | -                                           | -        | -        | -                   | -                                           | -        | -        | -                   |
