# Supplementary material for: Complete Genome Characterization of Penicillimonavirus gammaplasmoparae, a Bipartite Member of the Family Mymonaviridae
Source: MDPI journal article supplement (doi:10.3390/plants12183300), 2023-09-18
Supplement: s1 [file s1]

**Table 1.** Primers used for detection and Sanger sequencing of Penicillimonavirus gammaplasmopara RNA 1 and RNA2 genomic segments. The target region and the amplified size (nt) are indicated.

| <i>Penicillimonavirus<br/>gammaplasmopara</i> | Primer name         | Primer sequence (5′-3′)             | Target    | Product size<br>(nt) |
|-----------------------------------------------|---------------------|-------------------------------------|-----------|----------------------|
| RNA_1<br>(OP042367)                           | C-II-1F_Detection   | GTC CGC GCA AAA ATA AGA TAC         | 3′-UTR/pV | 554                  |
|                                               | C-II-554R_Detection | AGC ACG TTC AGA TTC TGA GTG         |           |                      |
|                                               | C-II-17F            | GAT ACA GAC AGA CTA ACT ATG ATG AAG | 3′-UTR/pV | 538                  |
|                                               | C-II-554R_Detection | AGC ACG TTC AGA TTC TGA GTG         |           |                      |
|                                               | C-II-479F           | ACT CTC ATA GTC ACT TTT GTC G       | E2/pV     | 478                  |
|                                               | C-II-957R           | GAA CCT CAT CGA TAA GTA CAA CC      |           |                      |
|                                               | C-II-1349F          | GGA TCA GTA GGG TGA AGA GAA G       | pIV/pV    | 568                  |
|                                               | C-II-1917R          | TCA GTA TCT ATG AGT TAC GGA AAG A   |           |                      |
|                                               | C-II-1796F          | AGT TCC AGA TAG TTT CTC TCT CC      | pII/pIII  | 599                  |
|                                               | C-II-2395R          | GAA ACT CTC TTT TGA CCC TTG C       |           |                      |
|                                               | C-II-2769F          | AGG AAT CTT GTA GGT GTC AAT G       | E2/pII    | 709                  |
|                                               | C-II-3478R          | CTT GTA CCA CCG CTC CAG             |           |                      |
|                                               | C-II-3321F          | GTT GAT GGT GCG AGA ATA T           | pI/pII    | 417                  |
|                                               | C-II-3738R          | ATA CTC AAC TGA TGG ATC ACG TT      |           |                      |
|                                               | C-II-3406F          | TGC TCG ACG TCC TTG ATC AG          | pI/pII    | 662                  |
|                                               | C-II-4068R          | AAC AAA TGA AGC GTG GCC T           |           |                      |
|                                               | C-II-3716F          | AAC GTG ATC CAT CAG TTG AGT AT      | pI        | 380                  |
|                                               | C-II-4096R          | AGT CTA GTC AAG CAA GAT GAG GA      |           |                      |
|                                               | C-II-3999F          | ACG TTC GTG TTT ACA AAA GGC         | 5′-UTR/pI | 531                  |
|                                               | C-II-4530R          | AAA GTG CGA AAG TGA CCC             |           |                      |
|                                               | C-II-3999F          | ACG TTC GTG TTT ACA AAA GGC         | 5′-UTR/pI | 565                  |
|                                               | C-II-4564R          | CGC AAA AAT AAG ATA TAG ACA GAC GA  |           |                      |

|                  |                    |                                     |             |     |
|------------------|--------------------|-------------------------------------|-------------|-----|
| RNA_2 (OP042368) | C-I-6F_Detection   | GAG TGA CAG TGG TTT TTT CAA AA      | 3'UTR/RdRp  | 574 |
|                  | C-I-580R_Detection | CGC ATC ACT CAG TAG AAC TTA TC      |             |     |
|                  | C-I-981F           | GTC AGC CAG TCC TCC TAA             | RdRp        | 575 |
|                  | C-I-1556R          | TTT GCT GGT GAG GAC ATA AC          |             |     |
|                  | C-I-1495F          | ATG GCC CTA CAA CCG AGA G           | RdRp        | 542 |
|                  | C-I-2037R          | CGC ATC TAA AGA GTG TGT TTC A       |             |     |
|                  | C-I-1938F          | GTA TCC TCG TGT ATC AGC TAA C       | RdRp        | 687 |
|                  | C-I-2625R          | GGA ACA CGG CTA CAA GTT AG          |             |     |
|                  | C-I-2498F          | GAG TGT AGG CTA TGT TAT CTA AGA G   | RdRp        | 632 |
|                  | C-I-3130R          | ATA TCT CTC CGC TAC TCA ACC         |             |     |
|                  | C-I-3433F          | GGC AGT AAC AAT GCC ATC AAG A       | RdRp        | 581 |
|                  | C-I-4014R          | GGG AGG GTT TGA AGG ACT GAA         |             |     |
|                  | C-I-3911F          | ACG AGG TGA TTA TAT TGT TAA GCA T   | RdRp        | 632 |
|                  | C-I-4543R          | AGC TTC TCA ACA GAC GGA ACT T       |             |     |
|                  | C-I-4427F          | GCT TGA ATT CTC GTT CCT TTG         | RdRp        | 683 |
|                  | C-I-5110R          | CTG CAT ATA CGA GAA TGA TTG TCA     |             |     |
|                  | C-II-5012F         | TGG CAC ACA ATT TTG TCA CAC TT      | RdRp        | 602 |
|                  | C-II-5613R         | GTT AGT TGA AGA AGC CCT GTG T       |             |     |
|                  | C-I-5527F          | TTA TTT AAA CGA TTA GAC ACA CCT TTG | 5'-UTR/RdRp | 541 |
|                  | C-I-6068R          | ATT ATT CGACGCG ATT GTG CGG T       |             |     |
|                  | C-I-5527F          | TTA TTT AAA CGA TTA GAC ACA CCT TTG | 5'-UTR/RdRp | 567 |
|                  | C-I-6094R          | GCA CAC CAA AGG AAG GAA ATA CAG     |             |     |
