# Supplementary material for: Complete Genome Characterization of Penicillimonavirus gammaplasmoparae, a Bipartite Member of the Family Mymonaviridae
Source: MDPI journal article supplement (doi:10.3390/plants12183300), 2023-09-18
Supplement: s1 [file s1]

*Fraction numbers. RNA 1*

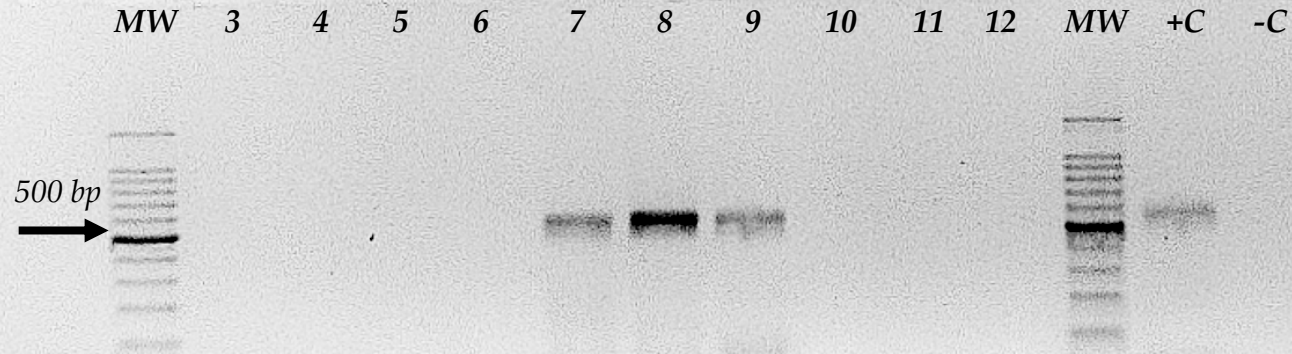

*Fraction numbers. RNA 2*

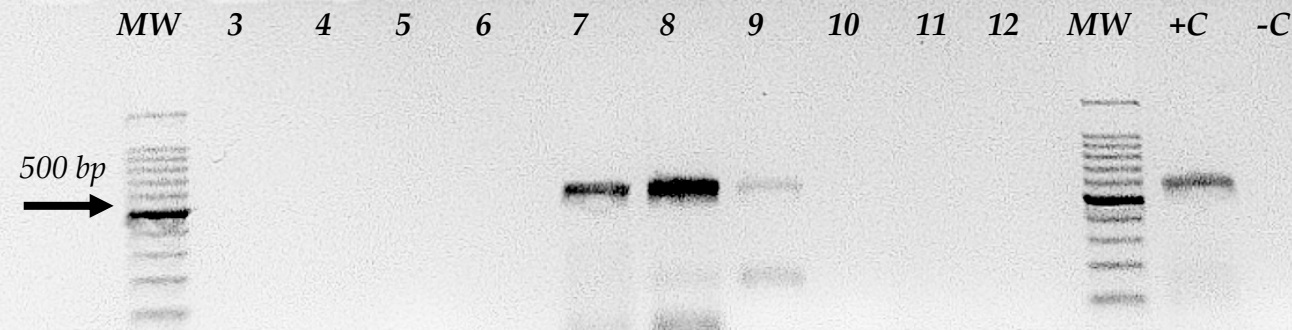

**Figure S1:** Co-sedimentation of *P. gammaplasmoparae* RNA1 and RNA2 in a sucrose gradient.
